# Supplementary material for: C K-edge NEXAFS spectra of graphene with physical and chemical defects: a study based on density functional theory
Source: Royal Society of Chemistry journal article supplement (doi:10.1039/c4cp01106f), 2014-01-01
Supplement: c4cp01106f1.pdf [file c4cp01106f1.pdf]

1 Supporting Information for :  
2 **C K-edge NEXAFS spectra of graphene with**  
3 **physical and chemical defects: A study based**  
4 **on density functional theory**

5 Christopher Ehlert<sup>1,2</sup>, Wolfgang E.S. Unger<sup>1</sup>, Peter Saalfrank<sup>2</sup>

<sup>1</sup> *BAM Bundesanstalt für Materialforschung und -prüfung,*  
*D-12203 Berlin, Germany*

<sup>2</sup> *Universität Potsdam, Institut für Chemie,*  
*Karl-Liebknecht-Str. 24-25, 14476 Potsdam-Golm, Germany*

6 The following two figures demonstrate the results of additional test calculations, for the  
7 single-vacancy case, as reported towards the end of section 3.2.2 in the main text. The first  
8 figure Fig.SI 1 shows NEXAFS spectra for a larger unit cell,  $9\times 9$ , to be compared to the results  
9 obtained with  $7\times 7$  in Fig.4 of the main text. The second figure Fig.SI 2 shows NEXAFS spectra  
10 for the case when this defect was decorated with a single rather than two, H atoms.

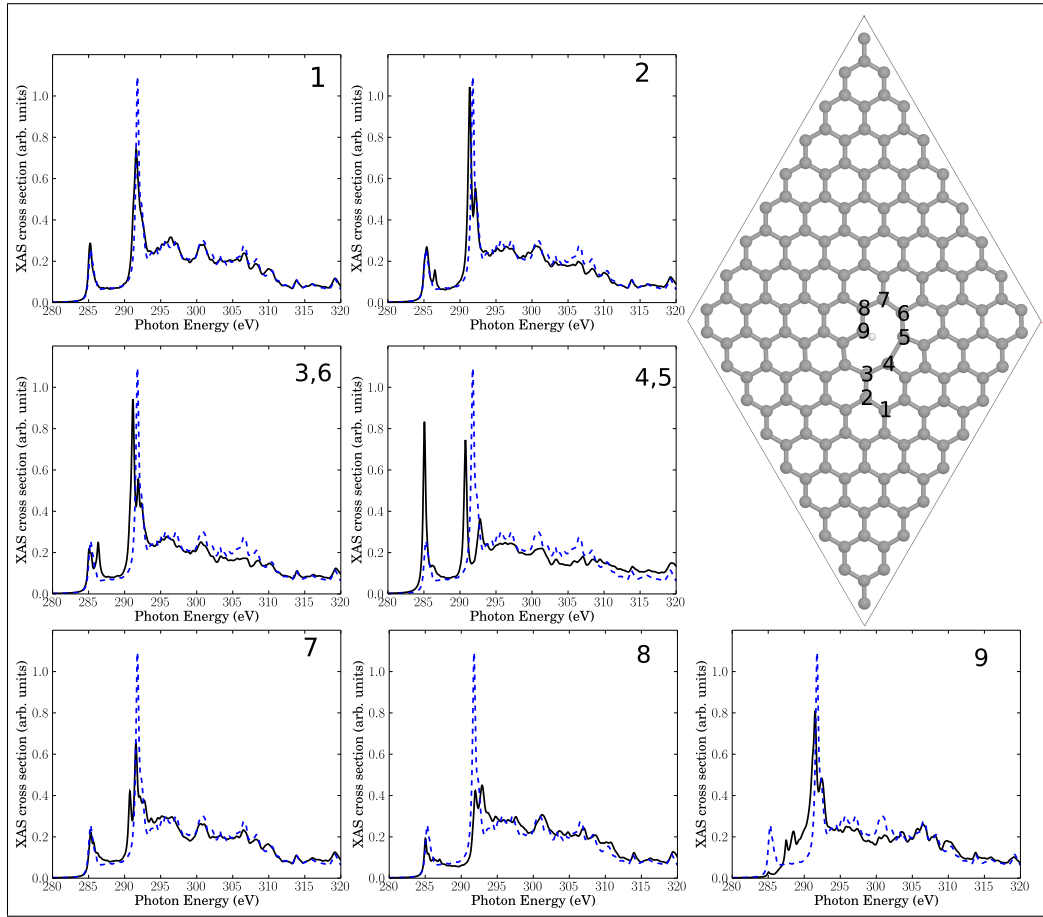

Fig\_SI 1: Upper right: Single-vacancy ( $V_1(5,9)$ ) defect, decorated with two H atoms (both at C atom 9), in a  $9 \times 9$  cell. The seven insets show NEXAFS spectra corresponding to core-hole creation in atoms 1-9, located close to the defect. Full, black lines: Computed NEXAFS spectra, dashed, blue lines: The theoretical spectrum of unperturbed graphene for comparison.

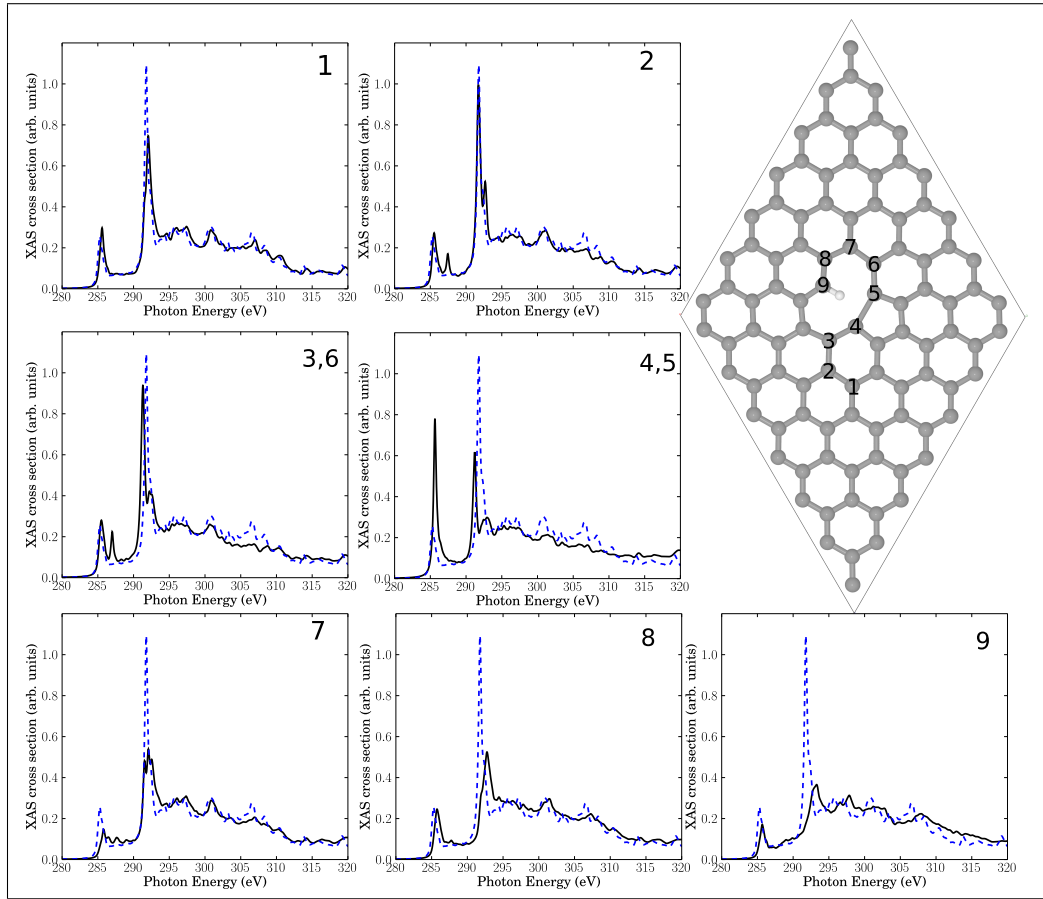

Fig\_SI 2: Upper right: Single-vacancy ( $V_1(5,9)$ ) defect, decorated with one H atom (at C atom 9), in a  $7 \times 7$  cell. The seven insets show NEXAFS spectra corresponding to core-hole creation in atoms 1-9, located close to the defect. Full, black lines: Computed NEXAFS spectra, dashed, blue lines: The theoretical spectrum of unperturbed graphene for comparison.
